# Supplementary material
Source: Research Square preprint supplement (doi:10.21203/rs.3.rs-9104737/v1)
Supplement: Supplementary file 1 [file 61c9c71c908abc6159fa3e02.pdf]

# PLANT GROWTH REGULATION

## Collection: Seeds of Resilience: Advances in Seed Biology and Priming for Sustainable Agriculture

### SUPPLEMENTARY FIGURES

**The *BEE2* gene integrates brassinosteroid signalling into a regulatory module controlling gibberellin-mediated germination.**

Julián CALLEJA-CABRERA<sup>†</sup>, Gerardo CARRERA-CASTAÑO<sup>†</sup>, Iris FAÑANÁS-PUEYO<sup>†</sup>, Rocío SÁNCHEZ-MONTESINO<sup>†</sup>, Mónica PERNAS\*, Luis OÑATE-SÁNCHEZ\*

*Centro de Biotecnología y Genómica de Plantas, (Universidad Politécnica de Madrid e Instituto Nacional de Investigación y Tecnología Agraria y Alimentaria/Consejo Superior de Investigaciones Científicas), Campus de Montegancedo, Pozuelo de Alarcón, 28223 Madrid, Spain.*

<sup>†</sup>These authors have contributed equally to this work.

**\*Corresponding authors:** [pernas.monica@inia.csic.es](mailto:pernas.monica@inia.csic.es);  
[luis.onate@upm.es](mailto:luis.onate@upm.es)

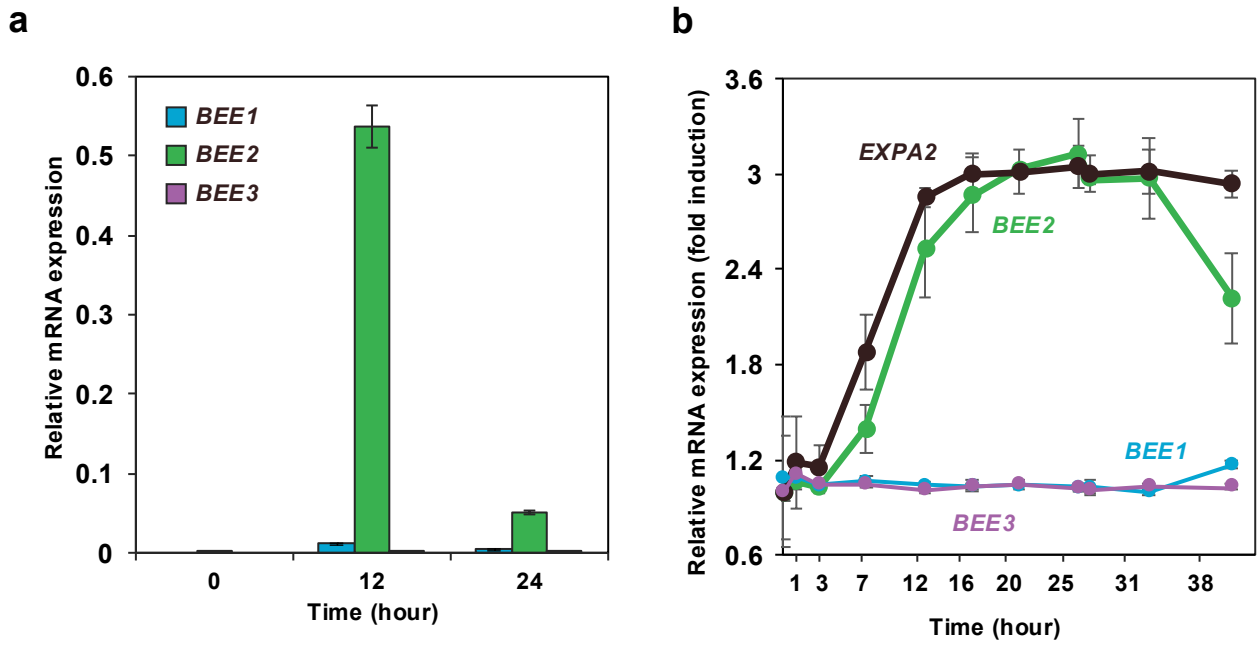

**c**

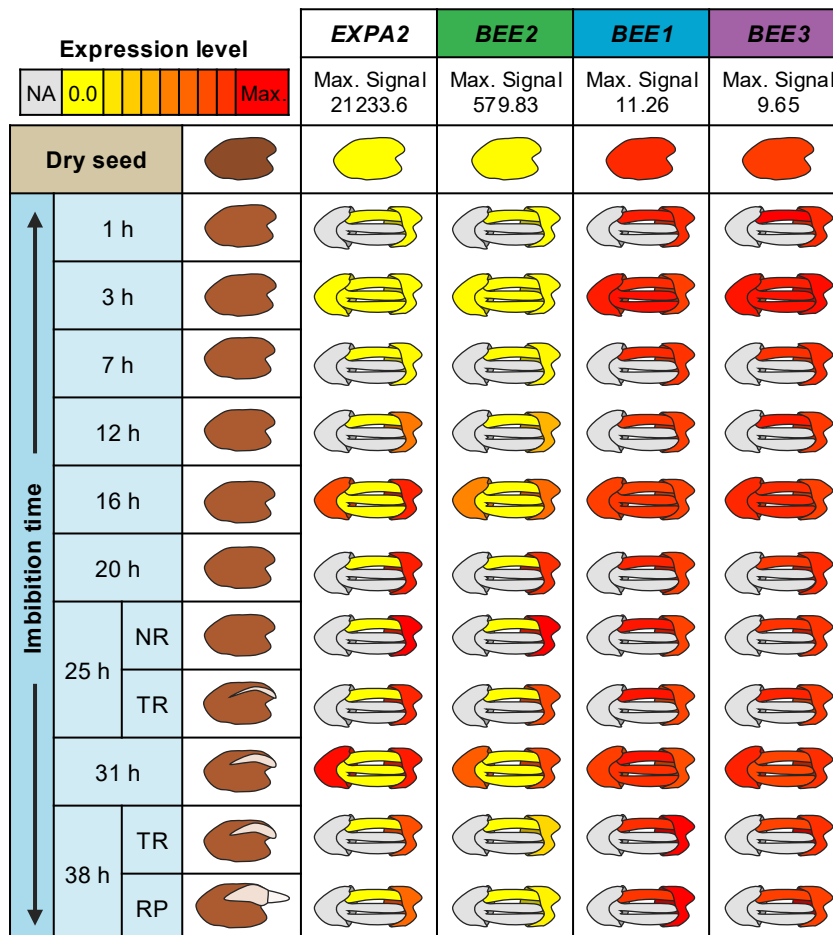

Figure S1

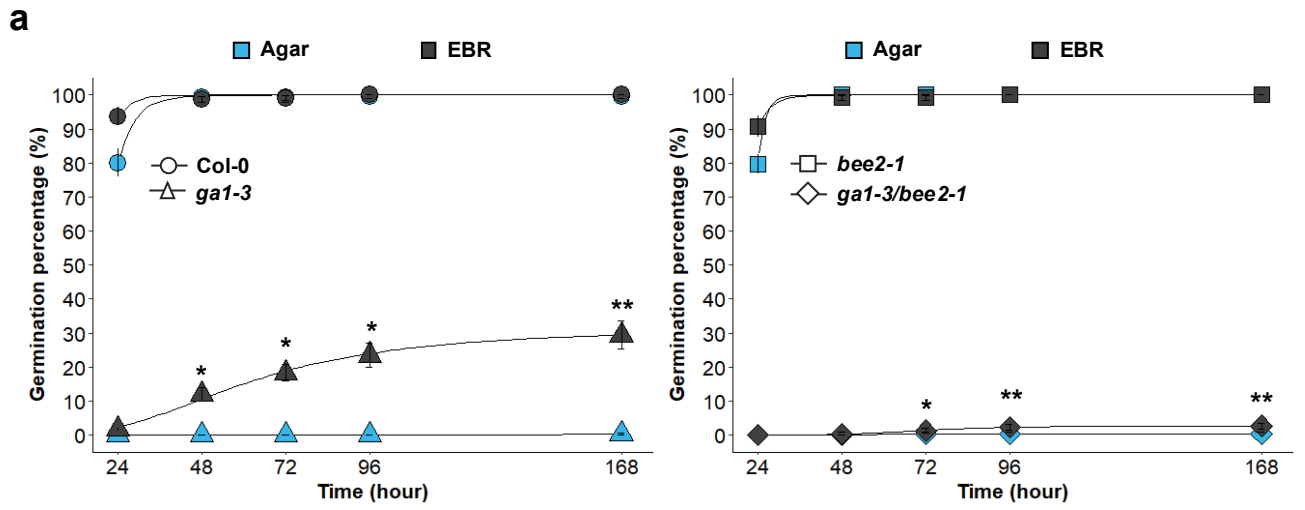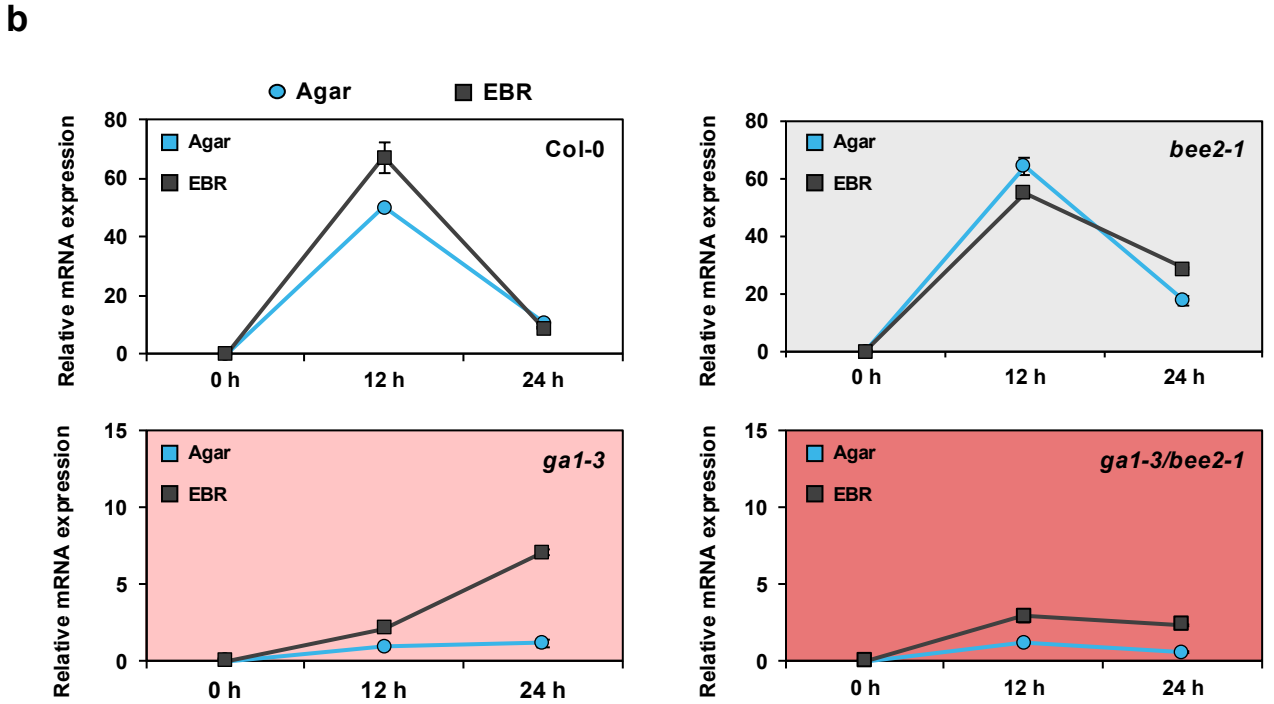

Figure S2
