# Supplementary material
Source: Research Square preprint supplement (doi:10.21203/rs.3.rs-9104737/v1)
Supplement: Supplementary file 1 [file 354075ba3241bbe9a23856af.xlsx]

## Sheet: Oligonucleotides
Table S1. List of Oligonucleotides Used.
Code	Gene	Locus	Description	Length	Sequence (5'-3')
LO1222	LBb1.3	N/A	T-DNA left border primer for SALK lines	19	ATTTTGCCGATTTCGGAAC
LO1333	Spm32	N/A	T-DNA left border primer for SM lines	29	TACGAATAAGAGCGTCCATTTTAGAGTGA
LO1332	LB-GabiKat	N/A	T-DNA left border primer for GK lines	23	ATATTGACCATCATACTCATTGC
LO1385	NAC25-LP	At1g61110	Oligo for nac25-2 genotyping	21	TCGCATTAATCCAACCAGAAG
LO1386	NAC25-RP	At1g61110	Oligo for nac25-2 genotyping	21	AACCAAAATGAGGTATGTGCG
LO1946	BEE2-1-RP	At4g36540	Oligo for genotyping of bee2-1 and bee2-2	21	AGGACATGACCACATGGTAGG
LO1947	BEE2-2-RP	At4g36540	Oligo for genotyping of bee2-1 and bee2-2	21	GGAGGACCTGTGAAGTAAGCC
LO729	UBC21-f	At5g25760	Forward oligo for Rt-qPCR	22	GCTCTTATCAAAGGACCTTCGG
LO730	UBC21-r	At5g25760	Reverse oligo for Rt-qPCR	22	CGAACTTGAGGAGGTTGCAAAG
LO267	EXP2-f	At5g05290	Forward oligo for Rt-qPCR	21	ATCGTTCCTGTCGCATTCAGA
LO268	EXP2-r	At5g05290	Reverse oligo for Rt-qPCR	21	TTCGTGATTAGCACGAGGTCG
LO2290	3xE-box f	At5g05290	Forward oligo for amplifying ProEXPA2(134 bp)::LUC construct (3xE-box)	30	CGATAGATCTTATCAAATGACATGTGAATC
LO2291	3xE-box r	At5g05290	Reverse oligo for amplifying ProEXPA2(134 bp)::LUC construct (3xE-box)	30	CCGTAAGCTTGTTAAGTCTTCACATGCAAT
LO2374	3xE-box-mut f	At5g05290	Forward oligo for amplifying the mutated ProEXPA2(134 bp)::LUC construct (3xE-box-mut)	38	CGATAGATCTTATCAAAAAACATAAAAATCTGTGATGC
LO2375	3xE-box-mut r	At5g05290	Reverse oligo for amplifying the mutated ProEXPA2(134 bp)::LUC construct (3xE-box-mut)	35	CCGTAAGCTTGTTAAGTCTTTTTATGCAATTCCGT
LO568	attB1-BEE2	At4g36540	Forward oligo for amplifying the BEE2 ORF	35	AAAAAAGCAGGCTTCATGGACTTGTCTGTACTTGA
LO569	attB2-BEE2	At4g36540	Reverse oligo for amplifying the BEE2 ORF	37	CAAGAAAGCTGGGTCTTACTTGAGGCTGAAGAAATTG
LO1957	CassetteGW-attR1F	N/A	Oligo for amplifying GW casstette from pDEST32 containing Xho1 at 5´-end	37	AATTCCTCGAGACAAGTTTGTACAAAAAAGCTGAACG
LO1958	CassetteGW-attR2R	N/A	Oligo for amplifying GW casstette from pDEST32 containing Spe1 at 5´-end	34	GGACTAGTACCACTTTGTACAAGAAAGCTGAACG
	attB1-EXPA2	At5g05290	Forward oligo to amplify 400 bp promoter fragment	47	GGGGACAAGTTTGTACAAAAAAGCAGGCTGTTTCTCATGACTGATGA
	attB2-EXPA2	At5g05290	Recerse oligo to amplify 400 bp promoter fragment	46	GGGGACCACTTTGTACAAGAAAGCTGGGTGAAGTTGGTAATTCGTT
